# Supplementary material
Source: publisher site journal article supplement (https://www.dovepress.com/article/supplementary_file/607414/607414%20Revised%20Supplementary%20Information.docx)
Supplement: Supplementary file 1 [file 607414%20Revised%20Supplementary%20Information.docx]

**Diagnostic value of copeptin and growth differentiation factor-15 for sepsis-related myocardial injury**

**Supplementary Figure** **1**. Univariate logistic regression for SMI

Abbreviations: WBC is white blood cell count, NEU ratio is neutrophil ratio, PCT is procalcitonin, CRP is C-reactive protein, BUN is urea nitrogen, NT-pro BNP is N-terminal pro-brain natriuretic peptide, LVEF is left ventricular ejection fraction, GDF-15 is Growth Differentiation Factor 15, SOFA score is Sequential Organ Failure Score, and APACHE II score is Acute Physiology and Chronic Health Evaluation Score II.

Supplementary Table 1. Compare different diagnostic models of SMI

| Models | Z value | *P*-value |
| --- | --- | --- |
| GDF-15 vs Combination1 | 2.688 | 0.007 |
| Copeptin vs Combination1 | 1.788 | 0.074 |
| NT-pro BNP vs Combination1 | 0.293 | 0.770 |
| NT-pro BNP vs Combination2 | 2.666 | 0.008 |
| Combination1 vs Combination2 | 2.801 | 0.005 |

Abbreviations: GDF-15 is growth differentiation factor 15; NT-proBNP is N-terminal pro-brain natriuretic peptide; Combination1 is GDF-15+Copeptin; Combination2 is GDF-15+Copeptin+BUN+creatinine+CRP+LVEF.

Supplementary Table 2 Bootstrap internal validation of the combined diagnostic models

| Models | Apparent_AUC | Mean_optimism | Optimism_corrected_AUC | Bootstrap_resamples |
| --- | --- | --- | --- | --- |
| Combination1 | 0.911 | 0.003 | 0.908 | 1000 |
| Combination2 | 0.963 | 0.013 | 0.950 | 1000 |

Abbreviations:Combination1:GDF-15+Copeptin; Combination 2 : GDF-15+Copeptin+BUN+ creatinine+CRP+LVEF; AUC, area under the receiver operating characteristic curve; BUN, blood urea nitrogen; CRP, C-reactive protein; GDF-15, growth differentiation factor-15; LVEF, left ventricular ejection fraction; SMI, sepsis-related myocardial injury.
